# Supplementary material for: RNA-Seq Analysis of Extradomain A and Extradomain B Fibronectin as Extracellular Matrix Markers for Cancer
Source: MDPI journal article supplement (doi:10.3390/cells12050685), 2023-02-21
Supplement: s1 [file s1]

**Supplementary Table S1**

| Sample Count by Cohort |                |      |      |                |              |      |      |     |              |      |              |     |                  |      |      |     |
|------------------------|----------------|------|------|----------------|--------------|------|------|-----|--------------|------|--------------|-----|------------------|------|------|-----|
| Cancer Type            | Normal Tissues |      |      | Primary Tumors |              |      |      |     |              |      |              |     |                  |      |      |     |
|                        | Total Count    | TCGA | GTEx | Total Count    | Pathologic T |      |      |     | Pathologic N |      | Pathologic M |     | Pathologic Stage |      |      |     |
|                        |                |      |      |                | T1           | T2   | T3   | T4  | N-           | N+   | M0           | M1  | I                | II   | III  | IV  |
| ACC                    | 128            | 0    | 128  | 77             | 8            | 38   | 8    | 17  | 62           | 9    | 0            | 0   | 9                | 36   | 15   | 15  |
| BLCA                   | 28             | 19   | 9    | 407            | 3            | 119  | 191  | 58  | 235          | 128  | 195          | 11  | 2                | 130  | 140  | 133 |
| BRCA                   | 292            | 113  | 179  | 1091           | 278          | 621  | 134  | 40  | 506          | 550  | 894          | 22  | 182              | 617  | 248  | 20  |
| CESC                   | 13             | 3    | 10   | 304            | 145          | 101  | 20   | 9   | 130          | 60   | 115          | 10  | 0                | 0    | 0    | 0   |
| CHOL                   | 9              | 9    | 0    | 36             | 19           | 12   | 5    | 0   | 26           | 5    | 28           | 5   | 19               | 9    | 1    | 7   |
| COAD                   | 349            | 41   | 308  | 286            | 6            | 44   | 195  | 40  | 165          | 120  | 192          | 40  | 44               | 110  | 82   | 40  |
| DLBC                   | 0              | 0    | 0    | 47             | 0            | 0    | 0    | 0   | 0            | 0    | 0            | 0   | 0                | 0    | 0    | 0   |
| ESCA                   | 666            | 13   | 653  | 181            | 31           | 41   | 84   | 4   | 73           | 87   | 130          | 9   | 18               | 76   | 55   | 9   |
| GBM                    | 1152           | 0    | 1152 | 152            | 0            | 0    | 0    | 0   | 0            | 0    | 0            | 0   | 0                | 0    | 0    | 0   |
| HNSC                   | 99             | 44   | 55   | 518            | 47           | 135  | 98   | 174 | 174          | 243  | 184          | 1   | 27               | 70   | 80   | 266 |
| KICH                   | 53             | 25   | 28   | 66             | 19           | 22   | 16   | 2   | 34           | 5    | 29           | 2   | 21               | 25   | 14   | 6   |
| KIRC                   | 100            | 72   | 28   | 530            | 247          | 61   | 160  | 10  | 213          | 12   | 380          | 67  | 266              | 57   | 123  | 81  |
| KIRP                   | 60             | 32   | 28   | 288            | 181          | 33   | 59   | 2   | 48           | 27   | 91           | 9   | 170              | 21   | 52   | 15  |
| LGG                    | 1152           | 0    | 1152 | 508            | 0            | 0    | 0    | 0   | 0            | 0    | 0            | 0   | 0                | 0    | 0    | 0   |
| LIHC                   | 160            | 50   | 110  | 369            | 178          | 93   | 80   | 13  | 249          | 4    | 263          | 4   | 169              | 86   | 85   | 5   |
| LUAD                   | 347            | 59   | 288  | 513            | 166          | 276  | 46   | 18  | 326          | 171  | 342          | 25  | 274              | 122  | 83   | 26  |
| LUSC                   | 338            | 50   | 288  | 498            | 111          | 289  | 70   | 22  | 312          | 174  | 404          | 7   | 242              | 161  | 84   | 7   |
| MESO                   | 0              | 0    | 0    | 87             | 14           | 24   | 31   | 12  | 42           | 37   | 54           | 3   | 10               | 16   | 45   | 16  |
| OV                     | 88             | 0    | 88   | 419            | 0            | 0    | 0    | 0   | 0            | 0    | 0            | 0   | 0                | 0    | 0    | 0   |
| PAAD                   | 171            | 4    | 167  | 178            | 5            | 23   | 134  | 3   | 45           | 118  | 76           | 4   | 21               | 147  | 3    | 4   |
| PCPG                   | 281            | 3    | 278  | 177            | 0            | 0    | 0    | 0   | 0            | 0    | 0            | 0   | 0                | 0    | 0    | 0   |
| PRAD                   | 152            | 52   | 100  | 495            | 0            | 0    | 0    | 0   | 321          | 75   | 0            | 0   | 0                | 0    | 0    | 0   |
| READ                   | 10             | 10   | 0    | 91             | 4            | 13   | 63   | 10  | 38           | 50   | 63           | 12  | 12               | 24   | 33   | 13  |
| SARC                   | 2              | 2    | 0    | 258            | 0            | 0    | 0    | 0   | 0            | 0    | 0            | 0   | 0                | 0    | 0    | 0   |
| SKCM                   | 813            | 1    | 812  | 102            | 1            | 5    | 10   | 84  | 58           | 28   | 97           | 3   | 2                | 66   | 26   | 3   |
| STAD                   | 210            | 36   | 174  | 414            | 21           | 86   | 179  | 113 | 121          | 268  | 360          | 27  | 58               | 121  | 169  | 41  |
| TGCT                   | 0              | 0    | 0    | 132            | 72           | 50   | 5    | 0   | 45           | 13   | 111          | 4   | 53               | 12   | 14   | 0   |
| THCA                   | 338            | 59   | 279  | 504            | 122          | 143  | 160  | 22  | 203          | 201  | 252          | 9   | 283              | 52   | 112  | 55  |
| THYM                   | 2              | 2    | 0    | 119            | 0            | 0    | 0    | 0   | 0            | 0    | 0            | 0   | 0                | 0    | 0    | 0   |
| UCEC                   | 91             | 13   | 78   | 180            | 0            | 0    | 0    | 0   | 0            | 0    | 0            | 0   | 0                | 0    | 0    | 0   |
| UCS                    | 78             | 0    | 78   | 57             | 0            | 0    | 0    | 0   | 0            | 0    | 0            | 0   | 0                | 0    | 0    | 0   |
| UVM                    | 0              | 0    | 0    | 79             | 0            | 0    | 0    | 0   | 51           | 0    | 50           | 4   | 0                | 0    | 0    | 0   |
| Totals                 | 7182           | 712  | 6470 | 9163           | 1678         | 2229 | 1748 | 653 | 3477         | 2385 | 4310         | 278 | 1882             | 1958 | 1464 | 762 |

**Supplementary Table S1. Sample Sizes.** Table of TCGA diseases and corresponding sample sizes for normal tissues and primary tumors. Normal tissue sample sizes are broken down by TCGA and GTEx samples. Primary tumors are broken down by cohort, including by various pathologic staging methods.

## Supplementary Figure S1

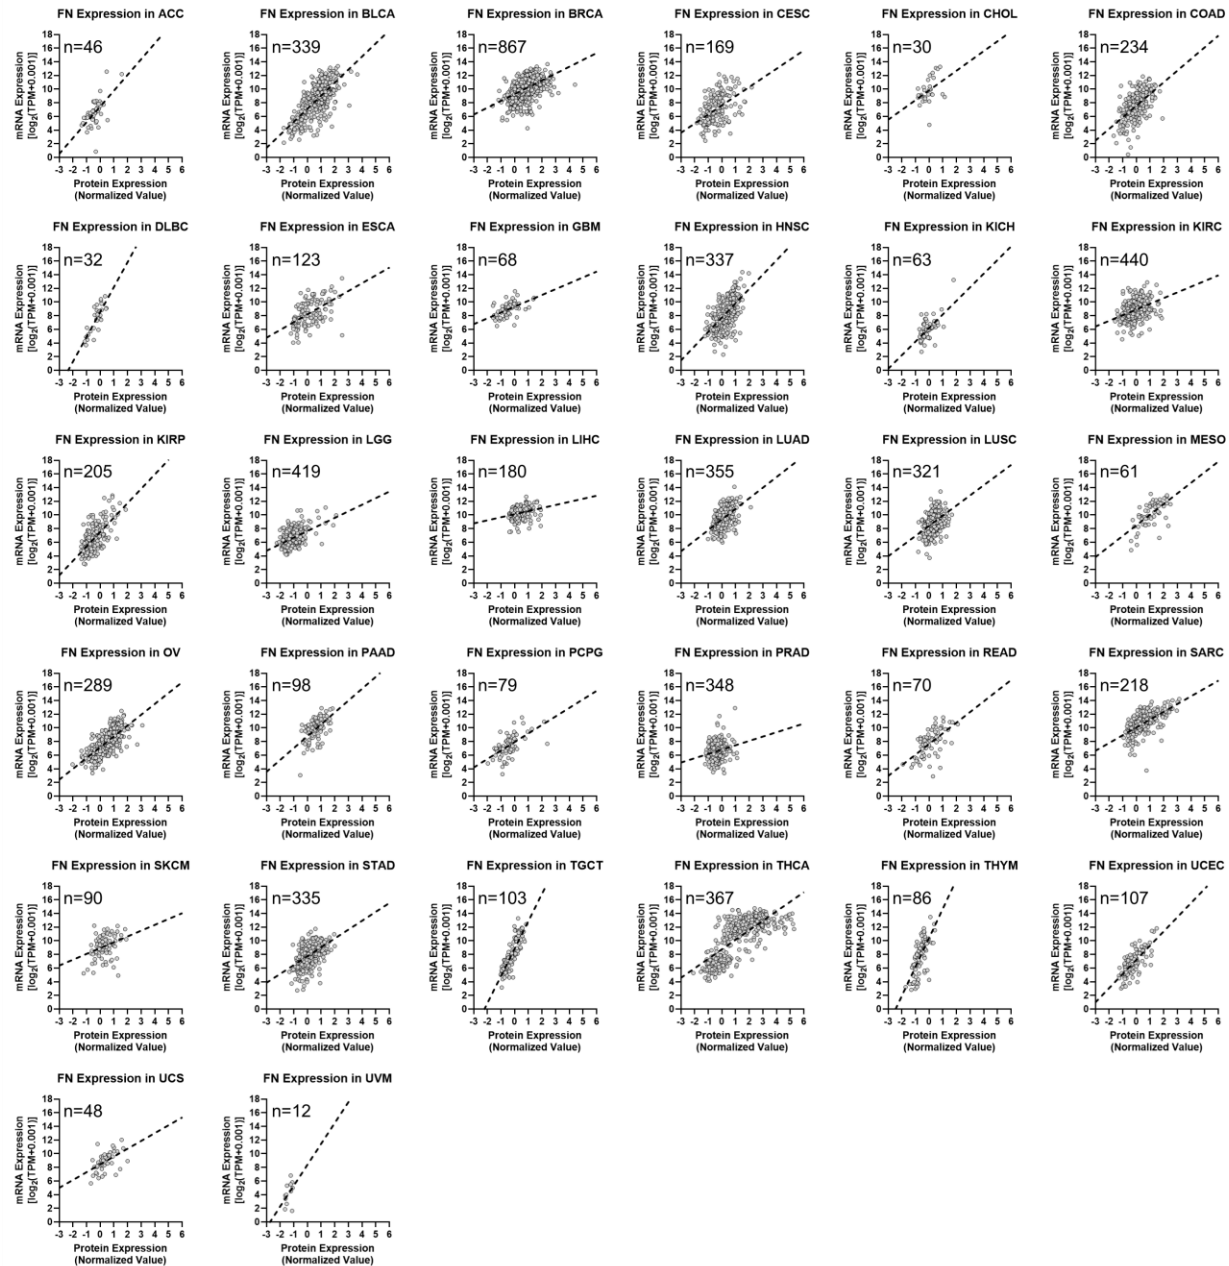

**Supplementary Figure S1.** Fibronectin mRNA expression (*FN1* gene) versus fibronectin protein expression separated by cancer type. There is an overall positive trend of increasing mRNA expression with increasing protein expression in every cancer type. Sample sizes for each cancer type are indicated in each respective figure. Sample sizes shown here differ from the total primary tumor counts for each cancer type in **Supp. Table 1** due to sample exclusion caused by missing protein expression data, thus reducing the sample size for this analysis.

**Supplementary Table S2**

| Ensembl |                 |      | RefSeq        |      | Alternative Splicing |     |       | Protein |       |
|---------|-----------------|------|---------------|------|----------------------|-----|-------|---------|-------|
| Name    | Transcript ID   | cDNA | Transcript ID | cDNA | EDA                  | EDB | IIICS | AA's    | Exons |
| -       | -               | -    | XM_017003692  | 8132 | Y                    | Y   | V0    | 2357    | 46    |
| -       | -               | -    | XM_005246402  | 8324 | Y                    | Y   | V64   | 2421    | 47    |
| FN1-201 | ENST00000323926 | 8708 | NM_001306129  | 8297 | Y                    | Y   | V89   | 2446    | 47    |
| -       | -               | -    | XM_024452769  | 8417 | Y                    | Y   | V95   | 2452    | 46    |
| FN1-203 | ENST00000354785 | 8390 | NM_212482     | 8390 | Y                    | Y   | V120  | 2477    | 46    |
| FN1-209 | ENST00000432072 | 7759 | NM_001306130  | 7760 | -                    | Y   | V0    | 2267    | 45    |
| -       | -               | -    | NM_001365522  | 7952 | -                    | Y   | V64   | 2331    | 46    |
| -       | -               | -    | NM_001365521  | 8027 | -                    | Y   | V89   | 2356    | 46    |
| -       | -               | -    | NM_001365519  | 8045 | -                    | Y   | V95   | 2362    | 45    |
| -       | -               | -    | NM_001365517  | 8120 | -                    | Y   | V120  | 2387    | 45    |
| -       | -               | -    | NM_001365524  | 7757 | Y                    | -   | V0    | 2266    | 45    |
| FN1-212 | ENST00000446046 | 7952 | NM_212478     | 7949 | Y                    | -   | V64   | 2330    | 46    |
| FN1-202 | ENST00000336916 | 8435 | NM_002026     | 8024 | Y                    | -   | V89   | 2355    | 46    |
| -       | -               | -    | NM_001365520  | 8042 | Y                    | -   | V95   | 2361    | 45    |
| FN1-206 | ENST00000359671 | 8524 | NM_001365518  | 8117 | Y                    | -   | V120  | 2386    | 45    |
| FN1-205 | ENST00000357867 | 7898 | NM_212474     | 7487 | -                    | -   | V0    | 2176    | 44    |
| FN1-207 | ENST00000421182 | 8103 | NM_001306132  | 7679 | -                    | -   | V64   | 2240    | 45    |
| FN1-211 | ENST00000443816 | 7762 | NM_001306131  | 7754 | -                    | -   | V89   | 2265    | 45    |
| -       | -               | -    | NM_001365523  | 7772 | -                    | -   | V95   | 2271    | 44    |
| FN1-204 | ENST00000356005 | 7846 | NM_212476     | 7847 | -                    | -   | V120  | 2296    | 44    |

**Supplementary Table S2. List of all possible alternative splicing combinations of ECM fibronectin.** All possible combinations of alternative splicing are shown, with the corresponding splicing characteristics, amino acid length of the final protein, and the number of exons in the mature mRNA. Where applicable, the corresponding transcript names, IDs, and cDNA lengths from the Ensembl and RefSeq libraries are provided with their corresponding alternative splicing characteristics. The 10 ECM fibronectins from the Ensembl library are used in this study.

**Supplementary Table S3**

| Ensembl |                 |      | RefSeq        |      | Transcript Type | Alt. Splicing |     | Protein |       |
|---------|-----------------|------|---------------|------|-----------------|---------------|-----|---------|-------|
| Name    | Transcript ID   | cDNA | Transcript ID | cDNA |                 | EDA           | EDB | AA's    | Exons |
| FN1-208 | ENST00000426059 | 2388 | NM_054034     | 2388 | coding          | -             | -   | 657     | 13    |
| FN1-210 | ENST00000438981 | 723  | -             | -    | coding          | -             | -   | 241     | 4     |
| FN1-213 | ENST00000456923 | 3720 | -             | -    | coding          | -             | Y   | 1103    | 21    |
| FN1-214 | ENST00000460217 | 804  | -             | -    | non-coding      | -             | -   | -       | -     |
| FN1-215 | ENST00000461974 | 571  | -             | -    | non-coding      | -             | -   | -       | -     |
| FN1-216 | ENST00000469569 | 629  | -             | -    | non-coding      | -             | -   | -       | -     |
| FN1-217 | ENST00000471193 | 496  | -             | -    | non-coding      | -             | -   | -       | -     |
| FN1-218 | ENST00000473614 | 568  | -             | -    | non-coding      | -             | -   | -       | -     |
| FN1-219 | ENST00000474036 | 1058 | -             | -    | non-coding      | Y             | -   | -       | -     |
| FN1-220 | ENST00000480024 | 576  | -             | -    | non-coding      | -             | -   | -       | -     |
| FN1-221 | ENST00000480737 | 384  | -             | -    | non-coding      | -             | -   | -       | -     |
| FN1-222 | ENST00000485567 | 584  | -             | -    | non-coding      | -             | -   | -       | -     |
| FN1-223 | ENST00000490833 | 699  | -             | -    | non-coding      | Y             | -   | -       | -     |
| FN1-224 | ENST00000492816 | 9171 | -             | -    | non-coding      | Y             | Y   | -       | -     |
| FN1-225 | ENST00000494446 | 676  | -             | -    | non-coding      | -             | -   | -       | -     |
| FN1-226 | ENST00000496542 | 695  | -             | -    | non-coding      | -             | -   | -       | -     |
| FN1-227 | ENST00000498719 | 2433 | -             | -    | non-coding      | -             | -   | -       | -     |

**Supplementary Table S3. List of short fibronectin transcripts in the Ensembl library.**

Where applicable, the corresponding transcript names, IDs, and cDNA lengths from the Ensembl and RefSeq libraries are provided with the corresponding transcript type, alternative splicing characteristics, and protein structure. Just one short fibronectin transcript corresponds to a known fibronectin protein – ENST00000426059, migration stimulating factor.

**Supplementary Table S4**

| <i>FN1</i> and Alternative Splice Variant Expression Normalized to Normal Tissue Expression |             |       |                 |                   |                 |                   |                  |                   |
|---------------------------------------------------------------------------------------------|-------------|-------|-----------------|-------------------|-----------------|-------------------|------------------|-------------------|
| Cancer Type                                                                                 | Sample Size |       | <i>FN1</i> Gene |                   | Exon A          |                   | Exon B           |                   |
|                                                                                             | Normal      | Tumor | Normal Tissue   | Primary Tumor     | Normal Tissue   | Primary Tumor     | Normal Tissue    | Primary Tumor     |
| ACC                                                                                         | 128         | 77    | 1.0000 ± 0.6692 | 4.1435 ± 12.7642  | 1.0000 ± 0.9099 | 2.5222 ± 7.1233   | 1.0000 ± 3.6085  | 3.6085 ± 10.2473  |
| BLCA                                                                                        | 28          | 407   | 1.0000 ± 0.9600 | 1.3219 ± 2.1185   | 1.0000 ± 1.1458 | 0.7545 ± 1.4407   | 1.0000 ± 0.9419  | 0.9419 ± 1.5619   |
| BRCA                                                                                        | 292         | 1091  | 1.0000 ± 0.7664 | 8.4374 ± 7.3495   | 1.0000 ± 1.0620 | 14.2768 ± 14.2305 | 1.0000 ± 9.5761  | 9.5761 ± 8.9922   |
| CESC                                                                                        | 13          | 304   | 1.0000 ± 0.6784 | 1.0588 ± 1.9865   | 1.0000 ± 0.9248 | 1.1314 ± 2.5457   | 1.0000 ± 0.9501  | 0.9501 ± 1.8537   |
| COAD                                                                                        | 349         | 286   | 1.0000 ± 0.9417 | 0.6002 ± 0.7931   | 1.0000 ± 1.2363 | 0.9483 ± 1.4763   | 1.0000 ± 0.6558  | 0.6558 ± 0.8904   |
| ESCA                                                                                        | 666         | 181   | 1.0000 ± 0.9332 | 0.7995 ± 1.3604   | 1.0000 ± 1.1767 | 1.8846 ± 3.5028   | 1.0000 ± 0.9642  | 0.9642 ± 1.6178   |
| GBM                                                                                         | 1152        | 152   | 1.0000 ± 1.0945 | 18.4856 ± 18.2224 | 1.0000 ± 1.6374 | 19.9746 ± 31.1553 | 1.0000 ± 20.0425 | 20.0425 ± 23.0437 |
| HNSC                                                                                        | 99          | 518   | 1.0000 ± 1.9076 | 7.3923 ± 17.2120  | 1.0000 ± 2.2103 | 11.6908 ± 29.7691 | 1.0000 ± 7.7161  | 7.7161 ± 18.2281  |
| KICH                                                                                        | 53          | 66    | 1.0000 ± 0.8295 | 2.3026 ± 11.9676  | 1.0000 ± 1.1194 | 7.6372 ± 51.1221  | 1.0000 ± 3.4673  | 3.4673 ± 20.1228  |
| KIRC                                                                                        | 100         | 530   | 1.0000 ± 0.9919 | 4.8906 ± 5.7736   | 1.0000 ± 1.1196 | 4.7617 ± 5.2775   | 1.0000 ± 5.3044  | 5.3044 ± 5.7938   |
| KIRP                                                                                        | 60          | 288   | 1.0000 ± 0.7741 | 3.2160 ± 8.8394   | 1.0000 ± 0.9472 | 2.2709 ± 6.0691   | 1.0000 ± 3.5869  | 3.5869 ± 12.8417  |
| LGG                                                                                         | 1152        | 508   | 1.0000 ± 1.0945 | 3.7652 ± 7.2043   | 1.0000 ± 1.6374 | 7.0209 ± 21.7095  | 1.0000 ± 4.4846  | 4.4846 ± 8.9559   |
| LIHC                                                                                        | 160         | 369   | 1.0000 ± 0.4299 | 1.9749 ± 1.1086   | 1.0000 ± 0.9527 | 4.5765 ± 5.0475   | 1.0000 ± 2.6388  | 2.6388 ± 1.8166   |
| LUAD                                                                                        | 347         | 513   | 1.0000 ± 0.5074 | 0.7360 ± 0.8711   | 1.0000 ± 0.5595 | 1.0707 ± 1.5099   | 1.0000 ± 0.8177  | 0.8177 ± 0.9617   |
| LUSC                                                                                        | 338         | 498   | 1.0000 ± 0.5067 | 0.5458 ± 0.6799   | 1.0000 ± 0.5947 | 0.8174 ± 1.3884   | 1.0000 ± 0.6293  | 0.6293 ± 0.8254   |
| OV                                                                                          | 88          | 419   | 1.0000 ± 0.7705 | 2.0910 ± 2.8651   | 1.0000 ± 1.0042 | 2.6336 ± 4.4426   | 1.0000 ± 2.1045  | 2.1045 ± 3.2931   |
| PAAD                                                                                        | 171         | 178   | 1.0000 ± 4.6454 | 20.8991 ± 19.9512 | 1.0000 ± 4.8732 | 22.8846 ± 26.3040 | 1.0000 ± 23.9148 | 23.9148 ± 24.7221 |
| PCPG                                                                                        | 281         | 177   | 1.0000 ± 0.4116 | 0.4233 ± 0.6149   | 1.0000 ± 0.5507 | 0.5672 ± 0.9600   | 1.0000 ± 0.5343  | 0.5343 ± 0.8191   |
| PRAD                                                                                        | 152         | 495   | 1.0000 ± 1.4688 | 0.4121 ± 1.1527   | 1.0000 ± 1.8002 | 0.4493 ± 0.8338   | 1.0000 ± 0.5045  | 0.5045 ± 1.4441   |
| READ                                                                                        | 10          | 91    | 1.0000 ± 0.6667 | 1.8238 ± 2.2330   | 1.0000 ± 0.7795 | 1.5152 ± 1.9235   | 1.0000 ± 1.4718  | 1.4718 ± 1.8272   |
| SKCM                                                                                        | 813         | 102   | 1.0000 ± 1.6309 | 0.1931 ± 0.2097   | 1.0000 ± 1.6605 | 0.1555 ± 0.2041   | 1.0000 ± 0.2161  | 0.2161 ± 0.2598   |
| STAD                                                                                        | 210         | 414   | 1.0000 ± 1.7814 | 1.2729 ± 1.4017   | 1.0000 ± 1.8877 | 2.2715 ± 2.9304   | 1.0000 ± 1.4848  | 1.4848 ± 1.8098   |
| THCA                                                                                        | 338         | 504   | 1.0000 ± 1.9076 | 41.1509 ± 43.1256 | 1.0000 ± 1.6165 | 55.1068 ± 71.7984 | 1.0000 ± 52.7086 | 52.7086 ± 56.8121 |
| UCEC                                                                                        | 91          | 180   | 1.0000 ± 0.8025 | 0.6643 ± 1.4083   | 1.0000 ± 0.7241 | 0.5142 ± 1.2110   | 1.0000 ± 0.5454  | 0.5454 ± 1.2284   |
| UCS                                                                                         | 78          | 57    | 1.0000 ± 0.7987 | 2.0496 ± 2.1538   | 1.0000 ± 0.7196 | 1.7766 ± 2.3457   | 1.0000 ± 1.8877  | 1.8877 ± 2.2652   |
| Average                                                                                     | 7169        | 8405  | 1.0000 ± 0.0000 | 5.2260 ± 9.1488   | 1.0000 ± 0.0000 | 6.7685 ± 11.8037  | 1.0000 ± 0.0000  | 6.0303 ± 11.3735  |

**Supplementary Table S4. Expression data for the *FN1* gene and all transcripts containing the EDA or EDB exons.** Dataset produced from the TCGA and GTEx databases, showing sample sizes and average ± standard deviation of normalized expression of the *FN1* gene, Exon A, and Exon B for normal tissue and primary tumors for each cancer type included in the analysis. Cancer types that were excluded from analysis had fewer than 10 normal tissue or primary tumor samples.



**Supplementary Table S5**

| ECM Fibronectin and Alternative Splice Variant Expression Normalized to Normal Tissue Expression |             |       |                 |                   |                 |                   |                 |                    |
|--------------------------------------------------------------------------------------------------|-------------|-------|-----------------|-------------------|-----------------|-------------------|-----------------|--------------------|
| Cancer Type                                                                                      | Sample Size |       | ECM Fibronectin |                   | EDA-FN          |                   | EDB-FN          |                    |
|                                                                                                  | Normal      | Tumor | Normal Tissue   | Primary Tumor     | Normal Tissue   | Primary Tumor     | Normal Tissue   | Primary Tumor      |
| ACC                                                                                              | 128         | 77    | 1.0000 ± 0.8147 | 2.3333 ± 5.1108   | 1.0000 ± 0.9333 | 2.5833 ± 6.9951   | 1.0000 ± 0.9318 | 2.8831 ± 6.9693    |
| BLCA                                                                                             | 28          | 407   | 1.0000 ± 1.1941 | 0.7218 ± 1.3308   | 1.0000 ± 1.1742 | 0.7599 ± 1.4562   | 1.0000 ± 1.1432 | 0.4746 ± 0.8949    |
| BRCA                                                                                             | 292         | 1091  | 1.0000 ± 1.0899 | 11.7374 ± 12.8435 | 1.0000 ± 1.1325 | 15.5047 ± 15.5244 | 1.0000 ± 1.5024 | 14.3656 ± 16.7640  |
| CESC                                                                                             | 13          | 304   | 1.0000 ± 0.9209 | 1.1677 ± 2.3990   | 1.0000 ± 0.9552 | 1.2917 ± 2.8930   | 1.0000 ± 1.1654 | 0.9000 ± 2.4286    |
| COAD                                                                                             | 349         | 286   | 1.0000 ± 1.1926 | 1.3767 ± 2.2559   | 1.0000 ± 1.2711 | 1.0887 ± 1.7145   | 1.0000 ± 1.2772 | 0.7921 ± 1.5061    |
| ESCA                                                                                             | 666         | 181   | 1.0000 ± 1.2623 | 2.2472 ± 3.5895   | 1.0000 ± 1.2359 | 2.1532 ± 3.9807   | 1.0000 ± 1.3536 | 1.7872 ± 2.9124    |
| GBM                                                                                              | 1152        | 152   | 1.0000 ± 1.3310 | 15.1677 ± 18.5480 | 1.0000 ± 1.7119 | 22.3195 ± 32.5624 | 1.0000 ± 1.4539 | 22.3427 ± 50.5408  |
| HNSC                                                                                             | 99          | 518   | 1.0000 ± 2.2552 | 8.6302 ± 18.9887  | 1.0000 ± 2.2921 | 12.3831 ± 31.5085 | 1.0000 ± 2.5872 | 10.1559 ± 25.7445  |
| KICH                                                                                             | 53          | 66    | 1.0000 ± 1.1714 | 4.3365 ± 24.6129  | 1.0000 ± 1.1696 | 8.0166 ± 53.7062  | 1.0000 ± 1.2442 | 9.9580 ± 64.4335   |
| KIRC                                                                                             | 100         | 530   | 1.0000 ± 1.4342 | 3.4541 ± 3.7299   | 1.0000 ± 1.1393 | 4.7743 ± 5.2953   | 1.0000 ± 1.7664 | 4.1436 ± 4.5964    |
| KIRP                                                                                             | 60          | 288   | 1.0000 ± 1.0066 | 3.6525 ± 15.8933  | 1.0000 ± 0.9873 | 2.3328 ± 6.2361   | 1.0000 ± 1.2816 | 6.0674 ± 36.9811   |
| LGG                                                                                              | 1152        | 508   | 1.0000 ± 1.3310 | 6.3113 ± 15.2202  | 1.0000 ± 1.7119 | 7.8163 ± 24.8694  | 1.0000 ± 1.4539 | 5.6159 ± 11.4749   |
| LIHC                                                                                             | 160         | 369   | 1.0000 ± 1.1132 | 2.5818 ± 2.6808   | 1.0000 ± 1.1103 | 5.4047 ± 6.0215   | 1.0000 ± 1.3321 | 10.5842 ± 16.7214  |
| LUAD                                                                                             | 347         | 513   | 1.0000 ± 0.5711 | 1.2500 ± 1.8153   | 1.0000 ± 0.5612 | 1.2088 ± 1.7136   | 1.0000 ± 0.8531 | 2.4176 ± 4.3692    |
| LUSC                                                                                             | 338         | 498   | 1.0000 ± 0.6456 | 0.8832 ± 1.4846   | 1.0000 ± 0.6143 | 0.9277 ± 1.5723   | 1.0000 ± 0.8982 | 1.9575 ± 3.7337    |
| OV                                                                                               | 88          | 419   | 1.0000 ± 1.0297 | 3.1328 ± 5.6840   | 1.0000 ± 1.0832 | 3.0665 ± 5.1674   | 1.0000 ± 0.9066 | 1.3386 ± 3.2729    |
| PAAD                                                                                             | 171         | 178   | 1.0000 ± 5.3141 | 28.7942 ± 38.0742 | 1.0000 ± 5.1661 | 24.3167 ± 28.1375 | 1.0000 ± 5.4805 | 31.9525 ± 43.9665  |
| PCPG                                                                                             | 281         | 177   | 1.0000 ± 0.6017 | 0.8167 ± 1.3214   | 1.0000 ± 0.5999 | 0.7346 ± 1.2574   | 1.0000 ± 1.1687 | 4.5226 ± 7.3351    |
| PRAD                                                                                             | 152         | 495   | 1.0000 ± 2.0657 | 0.6674 ± 2.3211   | 1.0000 ± 1.9456 | 0.4932 ± 0.9183   | 1.0000 ± 1.7950 | 0.6747 ± 1.9892    |
| READ                                                                                             | 10          | 91    | 1.0000 ± 0.8029 | 1.4545 ± 1.9721   | 1.0000 ± 0.7779 | 1.5205 ± 1.9324   | 1.0000 ± 0.8052 | 0.9758 ± 1.3752    |
| SKCM                                                                                             | 813         | 102   | 1.0000 ± 1.6863 | 0.0843 ± 0.1049   | 1.0000 ± 1.6607 | 0.1541 ± 0.2040   | 1.0000 ± 1.6372 | 0.1182 ± 0.2809    |
| STAD                                                                                             | 210         | 414   | 1.0000 ± 1.8695 | 3.1111 ± 3.5595   | 1.0000 ± 1.9259 | 2.4912 ± 3.1450   | 1.0000 ± 1.9362 | 2.6072 ± 3.9671    |
| THCA                                                                                             | 338         | 504   | 1.0000 ± 1.4261 | 58.7022 ± 77.0177 | 1.0000 ± 1.6864 | 62.4100 ± 81.6540 | 1.0000 ± 1.6380 | 92.4559 ± 112.7638 |
| UCEC                                                                                             | 91          | 180   | 1.0000 ± 0.8766 | 0.5972 ± 1.4067   | 1.0000 ± 0.7757 | 0.5673 ± 1.3505   | 1.0000 ± 1.0321 | 0.4903 ± 1.1529    |
| UCS                                                                                              | 78          | 57    | 1.0000 ± 0.9151 | 1.7462 ± 2.6477   | 1.0000 ± 0.7725 | 1.9464 ± 2.6797   | 1.0000 ± 1.0667 | 2.3368 ± 2.8367    |
| Average                                                                                          | 7169        | 8405  | 1.0000 ± 0.0000 | 6.5983 ± 12.5204  | 1.0000 ± 0.0000 | 7.4506 ± 13.2494  | 1.0000 ± 0.0000 | 9.2767 ± 18.9099   |

**Supplementary Table S5. Expression data for ECM fibronectin and all full length transcripts containing the EDA or EDB exons.** Dataset produced from the TCGA and GTEx databases, showing sample sizes and average ± standard deviation of normalized expression of ECM fibronectin, EDA-FN, and EDB-FN for normal tissue and primary tumors for each cancer type included in the analysis. Cancer types that were excluded from analysis had fewer than 10 normal tissue or primary tumor samples.

Supplementary Figure S2

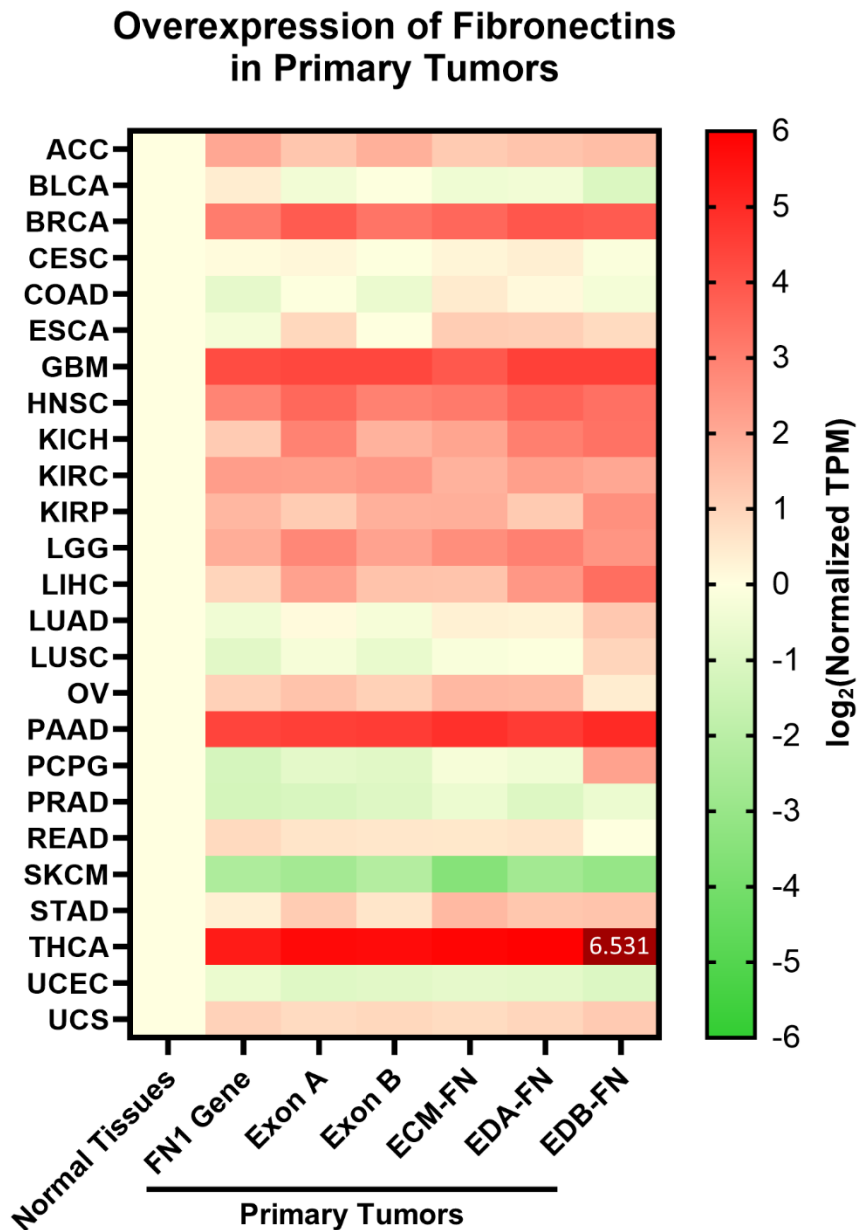

**Supplementary Figure S2. Heat map detailing the overexpression of the *FN1* Gene and all transcript groups presented in this study.** TPM expression values in primary tumors for each expression group were normalized to corresponding normal tissues for each cancer type. As such, the normalized expression in normal tissue for every expression group is 1. To remove repetitive results, the normalized expression in normal tissues is shown just once. In addition, the scale bar was kept consistent with that in Figures 1 and 3. One overexpression value – EDB-FN in THCA – exceeds the maximum value of the scale bar, so the overexpression value is stated in the heat map.

### Supplementary Figure S3

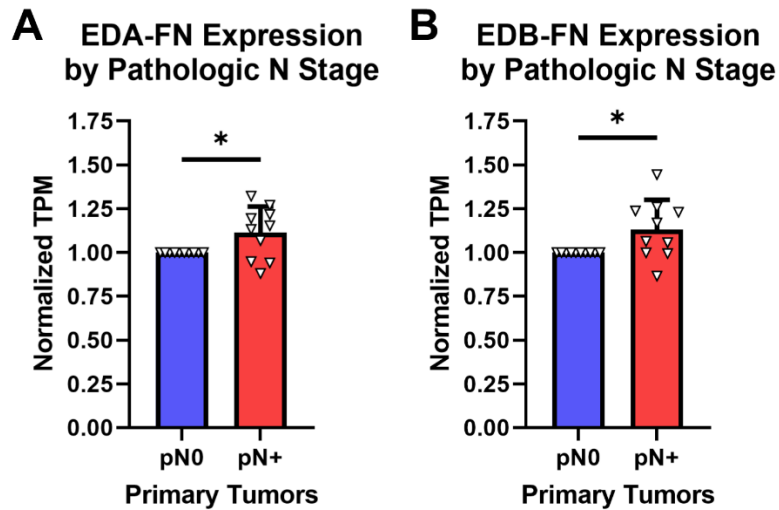

**Supplementary Figure S3. EDA-FN and EDB-FN expression in other cancer types with pathologic N staging information. (A) EDA-FN and (B) EDB-FN expression in cancer types in node negative (N0) or node positive (N+) primary tumors, excluding head and neck squamous cell carcinoma. Cancer types were excluded from analysis if the sample size of either node negative or node positive patients was fewer than 10. Significance: \*,  $p < 0.05$ .**



## Supplementary Figure S4

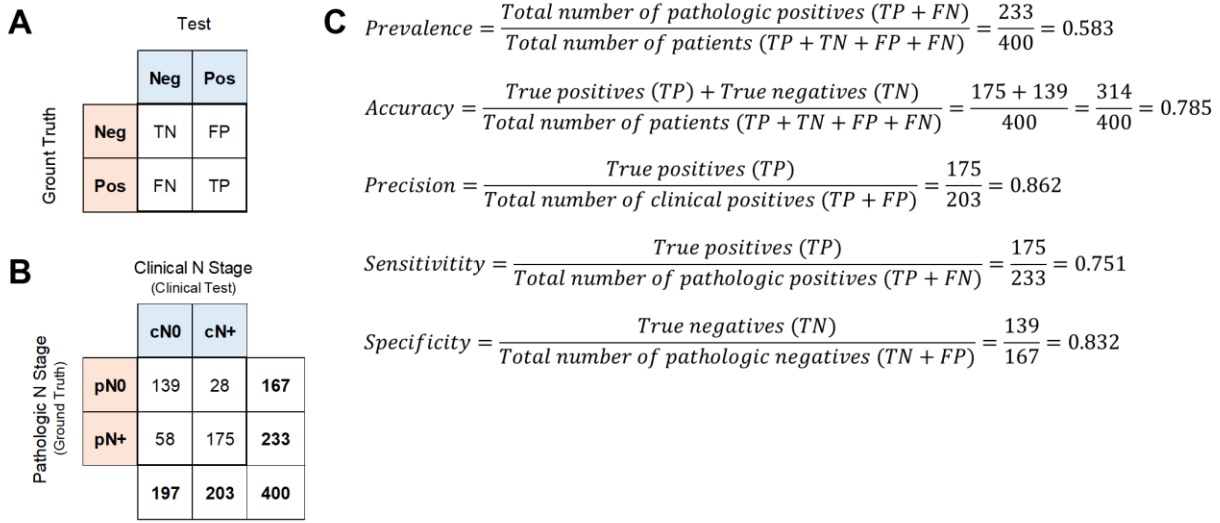

**Supplementary Figure S4. Confusion matrix for binary classification and calculation of statistics. (A)** Structure of a standard confusion matrix, showing the predictive test and the ground truth. Correct test outcomes are labeled true negative (TN) or true positive (TP), whereas incorrect test outcomes are labeled false negative (FN) or false positive (FP). **(B)** Structure of confusion matrix for head and neck squamous cell carcinoma (HNSC) lymph node diagnosis, with clinical N stage as the test and pathologic N stage as the ground truth. **(C)** Calculation of statistics from the confusion matrix from the data in (B).

## Supplementary Figure S5

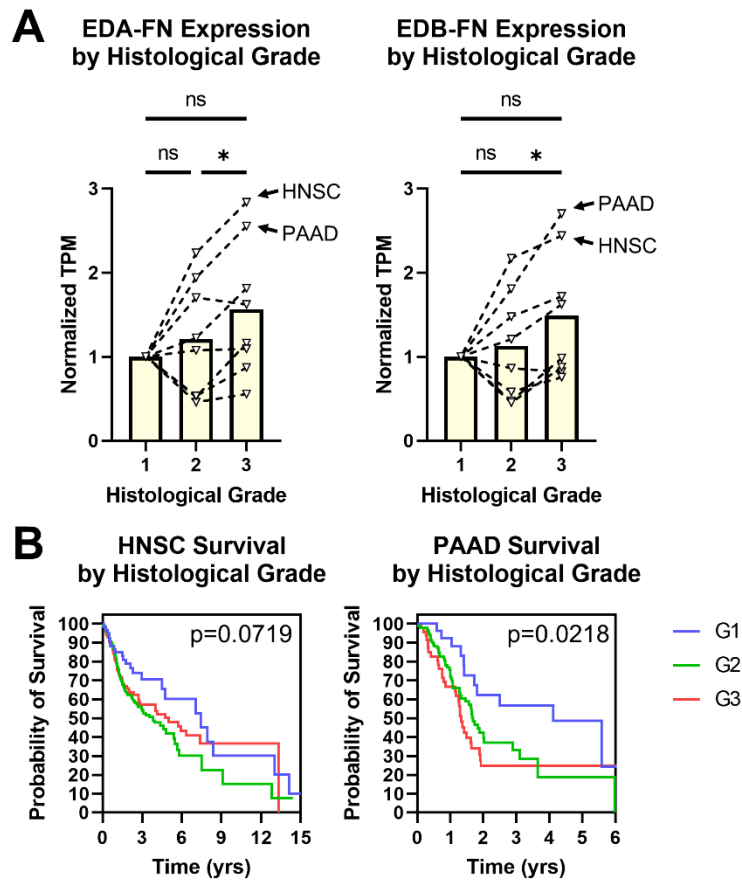

**Supplementary Figure S5. Oncofetal fibronectin expression in other cancer types with histological grading information. (A)** EDA-FN and EDB-FN expression in various cancer types by histological grade. Cancer types were excluded from analysis if the sample size in any cohort was fewer than 10. Grade 4 tumors were additionally excluded from analysis due to the small sample sizes in all but two cancer types. **(B)** Kaplan-Meier survival curves for HNSC and PAAD separated out by histological grade. HNSC and PAAD were selected because they most significantly overexpressed both EDA-FN and EDB-FN in high grade tumors.

**Supplemental Table S6**

| Median Survival Times Based on High and Low Oncofetal Fibronectin Expression |                       |             |          |             |                       |             |          |
|------------------------------------------------------------------------------|-----------------------|-------------|----------|-------------|-----------------------|-------------|----------|
| Cancer Type                                                                  | Median Survival (yrs) |             | % Change | Cancer Type | Median Survival (yrs) |             | % Change |
|                                                                              | Low EDA-FN            | High EDA-FN |          |             | Low EDB-FN            | High EDB-FN |          |
| BLCA                                                                         | 5.40                  | 1.95        | -63.9%   | BLCA        | 5.40                  | 1.82        | -66.3%   |
| BRCA                                                                         | 11.69                 | 10.05       | -14.0%   | BRCA        | 11.69                 | 10.05       | -14.0%   |
| CHOL                                                                         | 3.84                  | 3.34        | -13.0%   | ESCA        | 3.46                  | 1.64        | -52.5%   |
| ESCA                                                                         | 3.46                  | 1.87        | -46.1%   | GBM         | 1.24                  | 0.98        | -21.4%   |
| GBM                                                                          | 1.38                  | 0.99        | -28.3%   | HNSC        | 4.50                  | 4.79        | 6.5%     |
| HNSC                                                                         | 4.71                  | 4.36        | -7.4%    | LGG         | 9.78                  | 5.25        | -46.4%   |
| KIRC                                                                         | 7.57                  | 6.14        | -18.9%   | LIHC        | 4.91                  | 4.27        | -12.9%   |
| LGG                                                                          | 12.09                 | 5.48        | -54.7%   | LUAD        | 4.15                  | 3.31        | -20.3%   |
| LIHC                                                                         | 5.80                  | 4.27        | -26.3%   | LUSC        | 5.35                  | 3.16        | -40.9%   |
| LUAD                                                                         | 4.19                  | 3.47        | -17.4%   | MESO        | 2.36                  | 1.17        | -50.5%   |
| LUSC                                                                         | 6.26                  | 3.03        | -51.5%   | OV          | 3.71                  | 3.37        | -9.3%    |
| MESO                                                                         | 2.26                  | 1.05        | -53.4%   | PAAD        | 1.81                  | 1.62        | -10.3%   |
| OV                                                                           | 3.71                  | 3.63        | -2.2%    | SARC        | 7.05                  | 5.00        | -29.1%   |
| PAAD                                                                         | 1.79                  | 1.64        | -8.3%    | SKCM        | 3.71                  | 2.25        | -39.4%   |
| SARC                                                                         | 7.05                  | 4.52        | -36.0%   | STAD        | 3.85                  | 1.95        | -49.4%   |
| SKCM                                                                         | 3.71                  | 2.25        | -39.4%   | UCS         | 1.64                  | 2.30        | 40.4%    |
| STAD                                                                         | 3.85                  | 2.09        | -45.8%   |             |                       |             |          |
| UCS                                                                          | 2.11                  | 2.30        | 8.7%     |             |                       |             |          |
| Average                                                                      | 5.05                  | 3.47        | -28.8%   | Average     | 4.66                  | 3.31        | -26.0%   |

**Supplementary Table S6.** Median survival times of patients based on high and low expression of oncofetal fibronectins. Cancer types were excluded from this analysis if the Kaplan-Meier survival curves for either the low or high expression group failed to reach 50% survival.
